# Supplementary material
Source: PubMed Central journal article supplement (PMC3462642)
Supplement: supp_tpc.112.102012_tpc102012Supplemental.pdf [file supp_tpc.112.102012_tpc102012Supplemental.pdf]

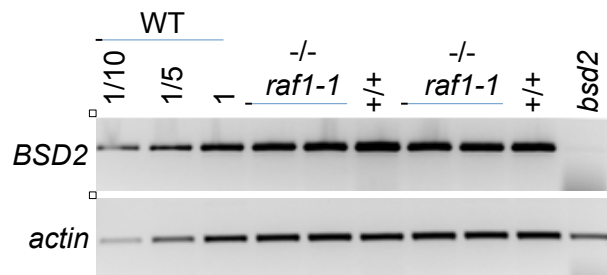

**Supplemental Figure 1.** Accumulation of the *BSD2* transcript in *raf1*.

RT-PCR was performed using primers ZmBSD2-SQF and ZmBSD2-SQR (Supplemental Table 3). Actin was used as the control gene amplified using primers ZmActin1-SQF and ZmActin1-SQR. Samples with genotype +/- are siblings of the parents of *raf1-1* homozygous (-/-) mutants. *bsd2* mutant was used as a negative control.

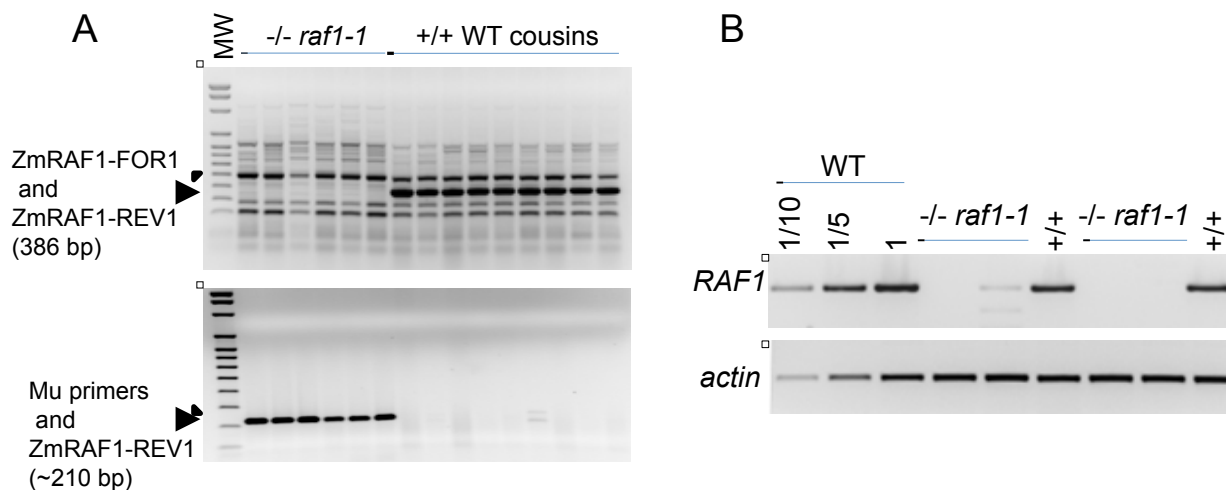

**Supplemental Figure 2.** Validation of *RAF1* gene identification.

**(A)** Gene-specific PCR validating *RAF1* identification. The higher and lower molecular weight products appear to result from mis-priming by the ZMRAF1-FOR1 primer.

**(B)** Accumulation of *RAF1* transcripts in *raf1-1*. RT-PCR was performed using ZmRAF1-FOR1 and ZmRAF1-REV1 primers. Actin was used as the control gene.

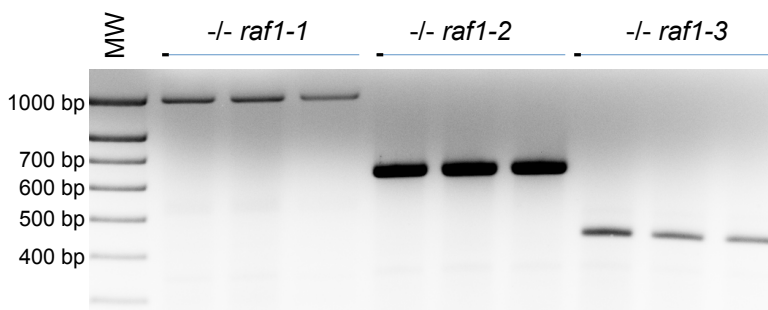

**Supplemental Figure 3.** Gene-specific PCR validating the locations of the three *RAF1* insertions.

The primers *Mu* and ZmRAF1-REV2 amplified the region between each insertion and 23 bp upstream of the stop codon.

**A**

| Ear | female parent(+) | male parent(+)  | segregating green F <sub>1</sub> | segregating pale green F <sub>1</sub> | <i>P</i> value |
|-----|------------------|-----------------|----------------------------------|---------------------------------------|----------------|
| 1   | <i>raf1-1-1</i>  | <i>raf1-2-1</i> | 34                               | 13                                    | 0.67           |
| 2   | <i>raf1-1-2</i>  | <i>raf1-2-1</i> | 38                               | 10                                    | 0.5            |
| 3   | <i>raf1-1-2</i>  | <i>raf1-2-3</i> | 33                               | 10                                    | 0.79           |
| 4   | <i>raf1-1-3</i>  | <i>raf1-3-6</i> | 32                               | 14                                    | 0.39           |
| 5   | <i>raf1-2-1</i>  | <i>raf1-1-1</i> | 22                               | 5                                     | 0.44           |
| 6   | <i>raf1-2-2</i>  | <i>raf1-1-3</i> | 32                               | 12                                    | 0.73           |
| 7   | <i>raf1-2-4</i>  | <i>raf1-1-3</i> | 22                               | 2                                     | 0.06           |
| 8   | <i>raf1-2-5</i>  | <i>raf1-1-1</i> | 30                               | 9                                     | 0.78           |
| 9   | <i>raf1-2-6</i>  | <i>raf1-1-2</i> | 32                               | 11                                    | 0.93           |
| 10  | <i>raf1-3-1</i>  | <i>raf1-1-2</i> | 26                               | 2                                     | 0.03           |
| 11  | <i>raf1-3-2</i>  | <i>raf1-1-1</i> | 33                               | 10                                    | 0.79           |
| 12  | <i>raf1-3-3</i>  | <i>raf1-1-3</i> | 36                               | 7                                     | 0.19           |
| 13  | <i>raf1-3-5</i>  | <i>raf1-1-1</i> | 19                               | 8                                     | 0.58           |
| 14  | <i>raf1-3-2</i>  | <i>raf1-2-4</i> | 10                               | 2                                     | 0.5            |

**B**

| Ear ID | cross   |         | <i>raf1</i> alleles |
|--------|---------|---------|---------------------|
|        | female  | male    |                     |
| A      | LF4.7   | LF3.4   | 1×2                 |
| B      | 4DT     | 31-6-10 | 2×1                 |
| C      | 108-2-3 | 31-6-10 | 3×1                 |
| D      | 31-6-10 | 7LS     | 1×3                 |

**C**

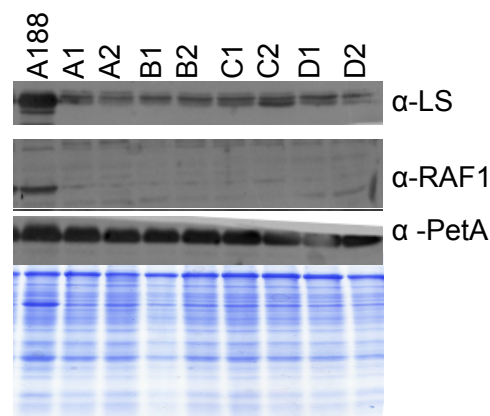

**Supplemental Figure 4.** Complementation crosses confirm that *raf1* encodes the regulator of Rubisco accumulation.

**(A)** Genetic analysis of crosses between heterozygotes carrying the indicated alleles. The *P*-value was derived from a Chi-squared test, based on the phenotypic segregation patterns of F<sub>1</sub> progeny.

**(B)** Crosses used for the immunoblot analysis in panel **(C)**.

**(C)** Immunoblot analysis of representative complementation cross progeny as given in panel **(B)**.

A

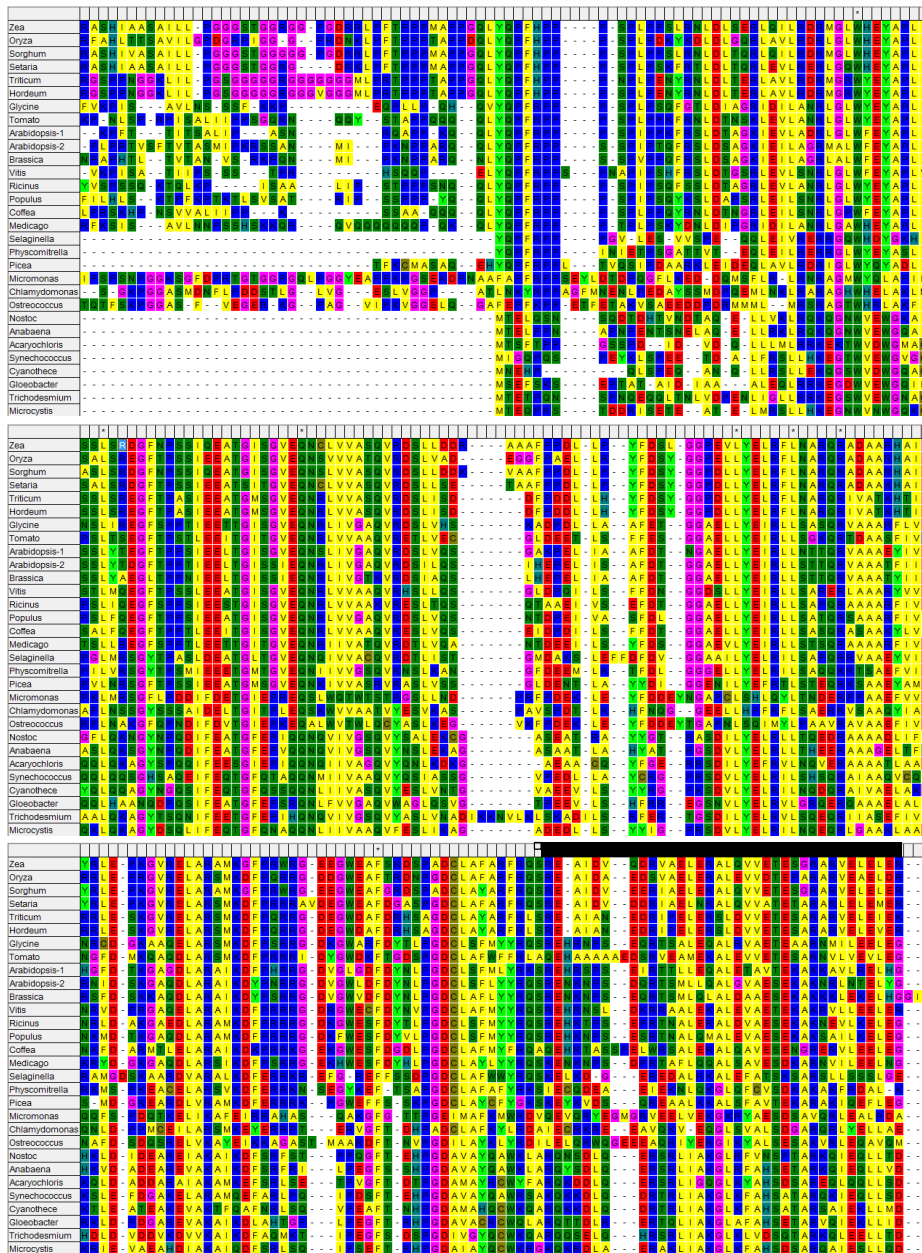

Supplemental Figure 5. Alignment of RAF1 homologues.

Page 1 of 2; see legend on page 2.

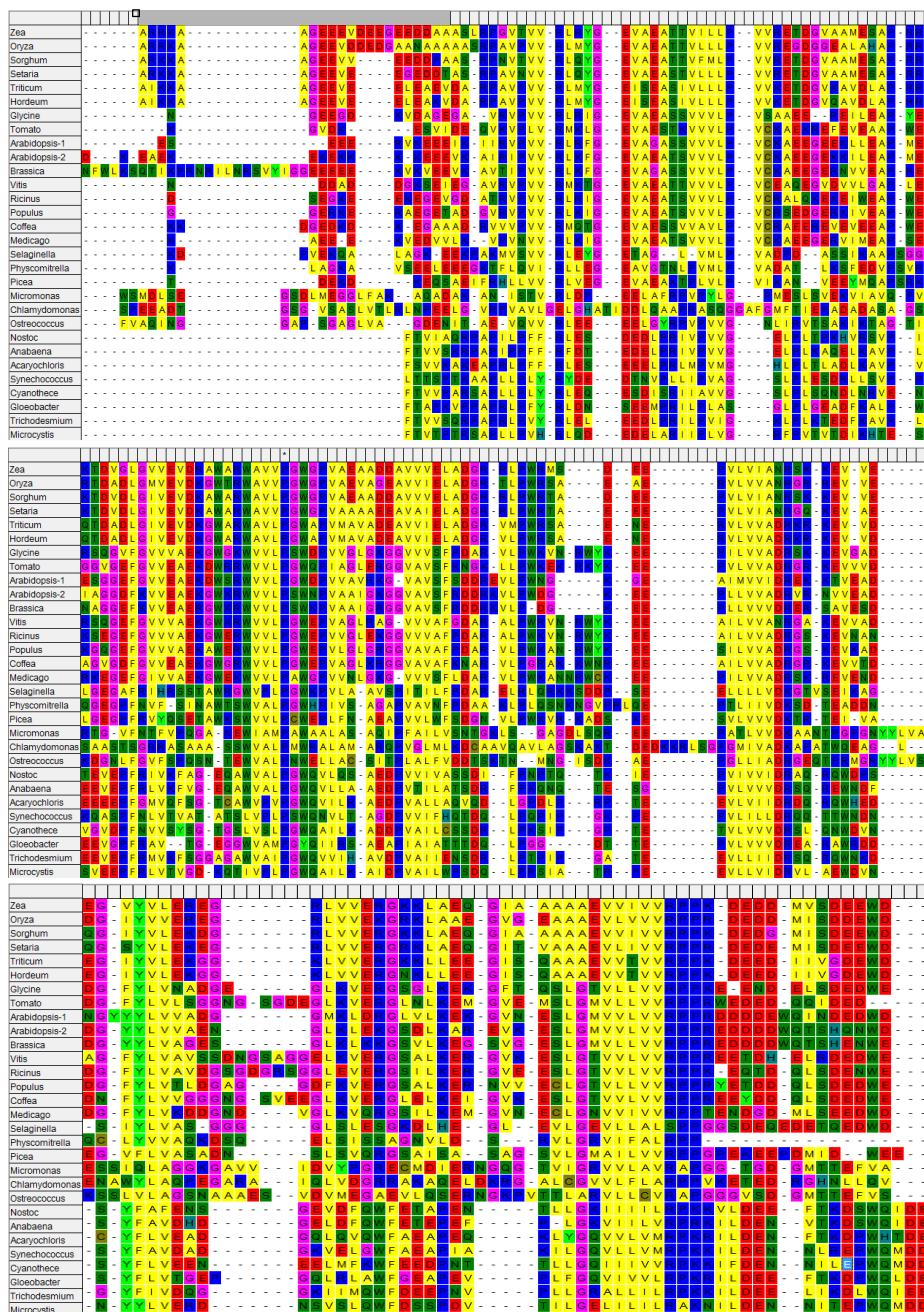

**Supplemental Figure 5.** Alignment of RAF1 homologues.

Alignments were performed using the ClustalW option of the MEGA4 program, after deletion of the predicted chloroplast transit peptide from the plant proteins. Amino acids are color coded as hydrophobic, yellow; polar, green; acidic, red; basic, blue; tyrosine, light green; glycine, pink; proline, blue; cysteine, brown; and histidine, light blue. The first 35 amino acids of a 60 amino acid domain identified by MGD as having homology to Docking domain A of the erythromycin polyketide synthase are highlighted with a black bar, whereas the last 21 amino acids, highlighted in gray, are conserved only in monocots and are absent from cyanobacterial proteins.

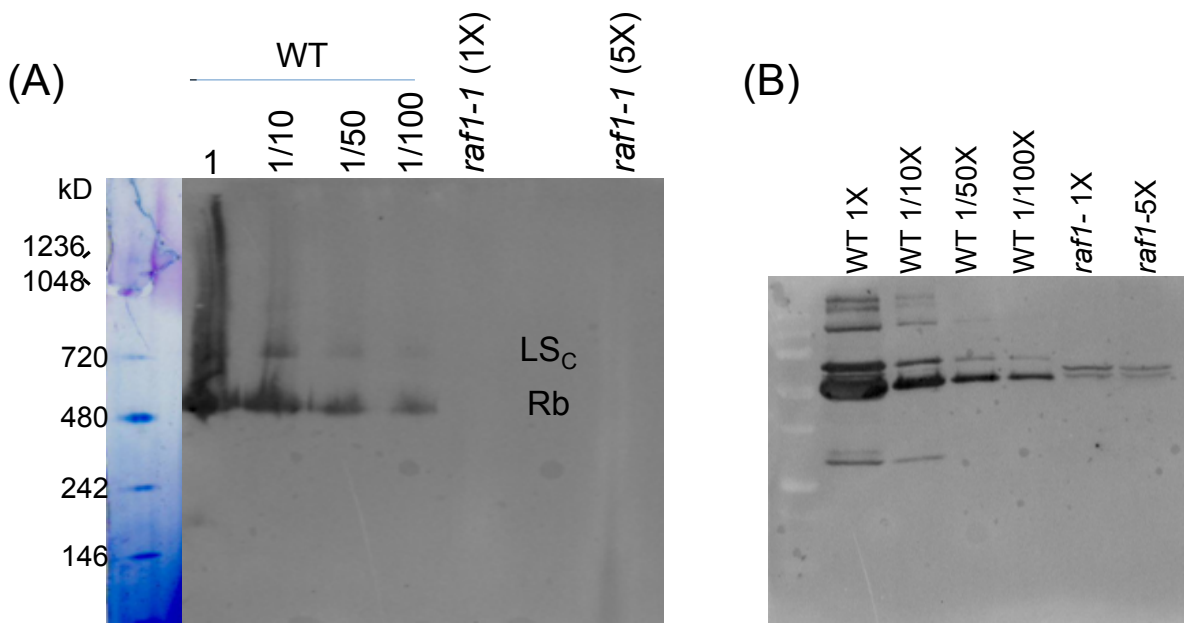

**Supplemental Figure 6.** Analysis of LS from total soluble protein.

(A) Native gel analysis. Total soluble leaf proteins of 10-day-old WT and *raf1-1* seedlings were extracted from equal surface areas and separated in a 3-12% native gel, which was analyzed by immunoblotting for LS.  $LS_C$  marks the migration of the putative LS-chaperone complex, and Rb the position of Rubisco holoenzyme.

(B) Denaturing gel analysis of the same protein samples.

**A**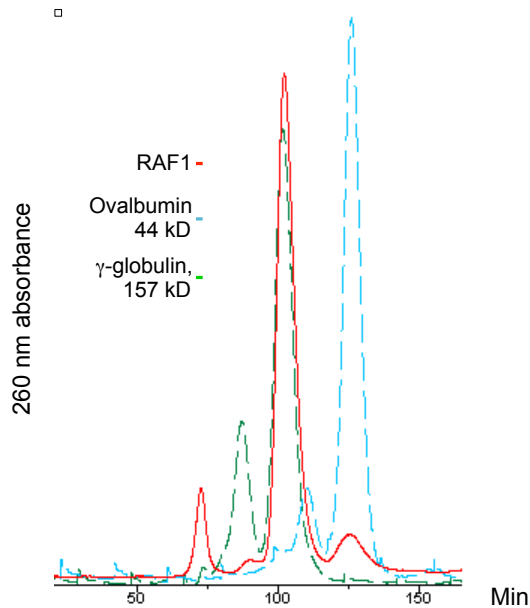**B** Charge envelope of the Raf monomer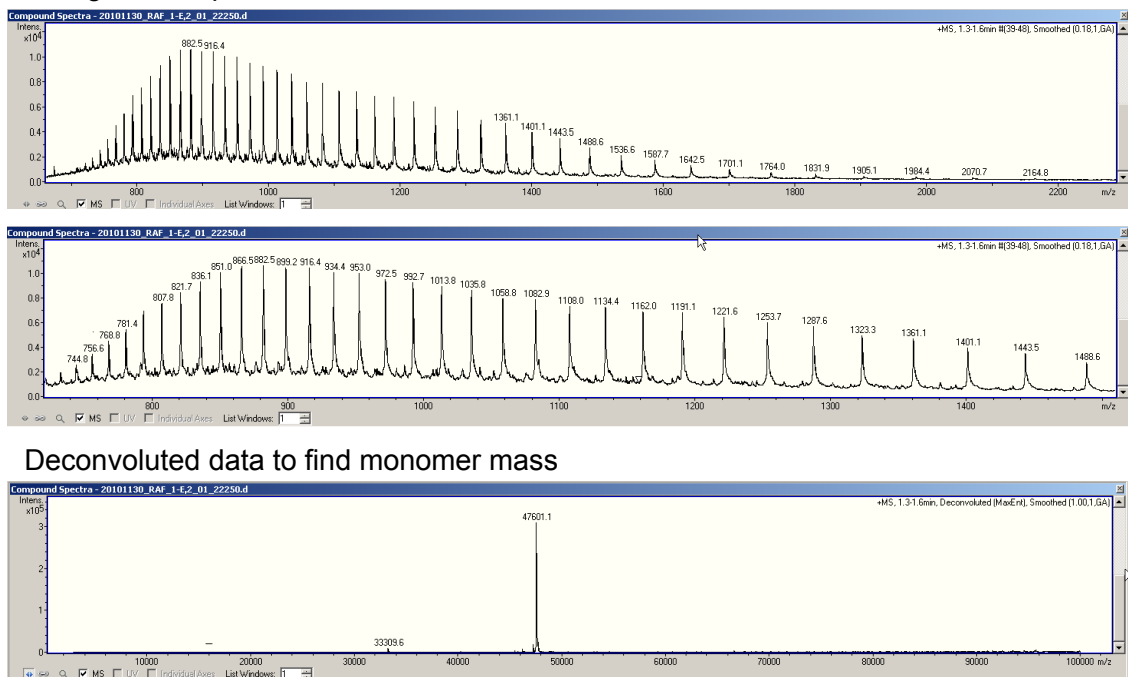**Supplemental Figure 7. Analysis of recombinant RAF1.**

**(A)** Purified  $\gamma$ -globulin, ovalbumin and RAF1 were separated in parallel by size exclusion chromatography. The smaller peaks observed for ovalbumin and  $\gamma$ -globulin are dimers. X-axis, time in min. QToF-MS was used to assess the purity of the three RAF1 peaks. Both the trimeric and monomeric peaks yielded a monomeric mass as 47,601.1 Da, corresponding to rRAF1. The peak migrating near 75 min, however, contained a mixture of proteins and thus cannot be confirmed as a RAF1 complex.

**(B)** QTOF mass spectrometry of the  $\sim$ 150 kDa peak of rRaf to determine the components of the higher molecular complex.

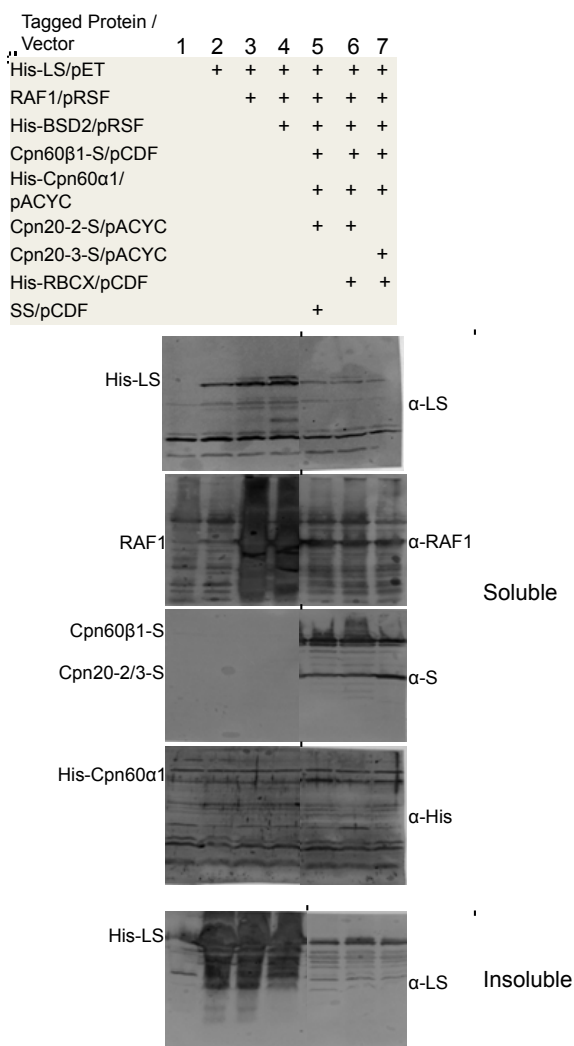

**Supplemental Figure 8.** Co-expression of LS and Rubisco biogenesis factors in *E. coli*.

The RAF1 requirement for the solubility of maize LS was assessed in *E. coli* cells with co-expression of RAF1 and other Rubisco biogenesis factors, including BSD2 (GRMZM2G062788), Cpn60α1, Cpn60β1, Cpn20-2 (GRMZM2G127609), Cpn20-3 (GRMZM2G399284), RBCX (GRMZM2G115476) and SS (GRMZM2G098520). Extracted lysate from untransformed *E. coli* BI21DE3 was used as negative control (lane 1).

**Methods:** Expression from Duet vectors (Novagen) was induced by 1 mM IPTG in BI21(DE3) cells grown to OD of 0.5, for two hr at 28°C. Equivalent amounts of cells were lysed by sonication and fractioned into soluble and insoluble fractions by centrifugation (15,000xg, 30 min at 4°C). Fractions were analyzed by 13% SDS-PAGE, followed by immunoblotting with LS (Agrisera), RAF1, S-tag (GenScript) and His-tag (Sigma) antibodies.



|    | Species                           | Locus         |
|----|-----------------------------------|---------------|
| 1  | <i>Zea mays</i>                   | GRMZM2G457621 |
| 2  | <i>Oryza sativa</i>               | NM_001071247  |
| 3  | <i>Sorghum bicolor</i>            | XM_002448739  |
| 4  | <i>Triticum aestivum</i>          | AK334642      |
| 5  | <i>Glycine max</i>                | AK285150      |
| 6  | <i>Arabidopsis thaliana-1</i>     | AT5G28500     |
| 7  | <i>Arabidopsis thaliana-2</i>     | AT3G04550     |
| 8  | <i>Brassica rapa</i>              | AC189468      |
| 9  | <i>Vitis vinifera</i>             | XM_002268512  |
| 10 | <i>Ricinus communis</i>           | XM_002521916  |
| 11 | <i>Populus trichocarpa</i>        | XM_002319615  |
| 12 | <i>Coffea canephora</i>           | ABZ89185      |
| 13 | <i>Medicago truncatula</i>        | AC146861      |
| 14 | <i>Selaginella moellendorffii</i> | XM_002964409  |
| 15 | <i>Physcomitrella patens</i>      | XM_001755326  |
| 16 | <i>Picea glauca</i>               | BT117013.1    |
| 17 | <i>Ostreococcus tauri</i>         | XM_003084347  |
| 18 | <i>Micromonas sp.</i>             | XM_002508645  |
| 19 | <i>Nostoc azollae</i>             | CP002059.1    |
| 20 | <i>Anabaena variabilis</i>        | CP000117.1    |
| 21 | <i>Acaryochloris marina</i>       | CP000828.1    |
| 22 | <i>Synechococcus sp.</i>          | CP000951.1    |
| 23 | <i>Cyanothece sp.</i>             | CP001287.1    |
| 24 | <i>Gloeobacter violaceus</i>      | BA000045.2    |
| 25 | <i>Trichodesmium erythraeum</i>   | CP000393.1    |
| 26 | <i>Microcystis aeruginosa</i>     | AM778923.1    |

**Supplemental Table 1.** Accession numbers of *RAF1* sequences from green species. The maize accession number was obtained from <http://www.maizegdb.org/>. The *raf1* loci from other species were obtained from Genbank, except the *Setaria viridis* sequence, which was kindly provided by Dr. Katrien Devos, Univ. Georgia. The protein sequence for *Selaginella moellendorffii* present in the database is incorrect.

21

## Data from WT sample

| Accession number                  | Annotation                                                   | Curated Loc.                      | Score | Match |
|-----------------------------------|--------------------------------------------------------------|-----------------------------------|-------|-------|
| <a href="#">GRMZM2G385622_P01</a> | (GRMZM2G062854_P01) CF1 beta subunit (atpB)                  | thylakoid-peripheral-stromal-side | 864   | 65    |
| <a href="#">GRMZM2G360821_P01</a> | Ribulose biphosphate carboxylase large subunit               | plastid stroma                    | 720   | 54    |
| <a href="#">NP_043022</a>         | CF1 $\alpha$ alpha subunit (atpA)                            | thylakoid-peripheral-stromal-side | 700   | 46    |
| <a href="#">GRMZM2G083841_P01</a> | Phosphoenolpyruvate carboxylase 1 (PEPCase 1)                | cytosol                           | 644   | 75    |
| <a href="#">GRMZM2G113033_P01</a> | Rubisco small subunit-4 (RBCS-4) -1                          | plastid stroma                    | 443   | 22    |
| <a href="#">GRMZM2G085019_P01</a> | NADP-malic enzyme 4-1&2 (NADP-ME4)                           | plastid stroma                    | 414   | 21    |
| <a href="#">GRMZM2G098520_P01</a> | Rubisco small subunit-4 (RBCS-4) -2                          | plastid stroma                    | 400   | 26    |
| <a href="#">GRMZM2G011507_P01</a> | pyruvate phosphate dikinase-1 (PPDK-1) M (C4)                | plastid stroma                    | 291   | 27    |
| <a href="#">GRMZM2G337113_P02</a> | glyceraldehyde-3-phosphate dehydrogenase A-2 (GAPA-2)        | plastid stroma                    | 183   | 15    |
| <a href="#">GRMZM2G048907_P01</a> | CF1 $\gamma$ subunit (atpC)                                  | thylakoid-peripheral-stromal-side | 170   | 17    |
| <a href="#">GRMZM2G083716_P01</a> | Cpn60-beta-1                                                 | plastid stroma                    | 153   | 17    |
| <a href="#">AC215201.3_FGP005</a> | Cpn60-alpha-1                                                | plastid stroma                    | 146   | 21    |
| <a href="#">GRMZM2G064096_P01</a> | germin-like protein (GER3)                                   |                                   | 111   | 10    |
| <a href="#">GRMZM2G046284_P01</a> | fructose-bisphosphate aldolase-2 (SFBA-2)                    | plastid stroma                    | 102   | 7     |
| <a href="#">GRMZM2G007263_P01</a> | glyceraldehyde-3-phosphate dehydrogenase B (M-enriched)      | plastid stroma                    | 80    | 8     |
| <a href="#">GRMZM2G106061_P01</a> | elongation factor Tu (EF-Tu-1), plastid                      | plastid stroma                    | 60    | 8     |
| <a href="#">GRMZM2G001696_P01</a> | phosphoenolpyruvate carboxykinase                            | mitochondria                      | 52    | 2     |
| <a href="#">GRMZM2G041275_P01</a> | ATP synthase beta subunit                                    | mitochondria                      | 48    | 4     |
| <a href="#">GRMZM2G083016_P01</a> | phosphoglycerate kinase 2 (PGK-2) BS-enriched                | plastid stroma                    | 43    | 6     |
| <a href="#">GRMZM2G089136_P01</a> | phosphoglycerate kinase 1 (PGK-1) M-enriched                 | plastid stroma                    | 43    | 8     |
| <a href="#">GRMZM2G018197_P01</a> | Ribosomal protein L4/L1 family                               | chloroplast/cytosol               | 42    | 6     |
| <a href="#">GRMZM2G098290_P01</a> | glutamate-ammonia ligase (GS2), chloroplast                  | plastid stroma                    | 41    | 5     |
| <a href="#">GRMZM2G079668_P01</a> | cpHSP70-1 (DnaK homologue)                                   | plastid stroma                    | 41    | 3     |
| <a href="#">NP_043046</a>         | ribosomal protein S18                                        | chloroplast                       | 38    | 2     |
| <a href="#">GRMZM2G084465_P01</a> | 40S ribosomal protein S23                                    |                                   | 36    | 3     |
| <a href="#">GRMZM2G007695_P01</a> | Ribosomal protein L4/L1 family                               | chloroplast/cytosol               | 35    | 4     |
| <a href="#">GRMZM2G015419_P02</a> | lipoxygenase 2.3                                             | chloroplast                       | 35    | 5     |
| <a href="#">GRMZM2G101689_P01</a> | U4/U6 small nuclear ribonucleoprotein PRP4-like protein-like |                                   | 35    | 4     |
| <a href="#">GRMZM2G353103_P01</a> | 40S ribosomal protein S16                                    |                                   | 33    | 1     |
| <a href="#">GRMZM2G016232_P01</a> | Histone H4                                                   | nucleus                           | 33    | 2     |
| <a href="#">GRMZM2G360021_P01</a> | 50S ribosomal protein L12-C                                  | plastid ribosome                  | 32    | 6     |

22

Data from *raf1* sample

|                                   |                                                         |                                   |      |     |
|-----------------------------------|---------------------------------------------------------|-----------------------------------|------|-----|
| <a href="#">GRMZM2G083841_P01</a> | Phosphoenolpyruvate carboxylase 1 (PEPCase 1)           | cytosol                           | 1409 | 123 |
| <a href="#">GRMZM2G011507_P01</a> | pyruvate phosphate dikinase-1 (PPDK-1) M (C4)           | plastid stroma                    | 565  | 46  |
| <a href="#">GRMZM2G085019_P01</a> | NADP-malic enzyme 4-1&2 (NADP-ME4)                      | plastid stroma                    | 462  | 17  |
| <a href="#">GRMZM2G385622_P01</a> | (GRMZM2G062854_P01) CF1 beta subunit (atpB)             | thylakoid-peripheral-stromal-side | 449  | 54  |
| <a href="#">NP_043022</a>         | CF1 $\alpha$ alpha subunit (atpA)                       | thylakoid-peripheral-stromal-side | 248  | 28  |
| <a href="#">GRMZM2G064096_P01</a> | germin-like protein (GER3)                              |                                   | 245  | 13  |
| <a href="#">GRMZM2G097457_P01</a> | C3-type pyruvate phosphate dikinase-2                   | plastid stroma                    | 192  | 12  |
| <a href="#">GRMZM2G106061_P01</a> | elongation factor Tu (EF-Tu-1), plastid                 | plastid stroma                    | 158  | 7   |
| <a href="#">GRMZM2G158394_P01</a> | extracellular ribonuclease LE precursor                 |                                   | 145  | 12  |
| <a href="#">GRMZM2G007263_P01</a> | glyceraldehyde-3-phosphate dehydrogenase B (M-enriched) | plastid stroma                    | 138  | 14  |
| <a href="#">GRMZM2G121878_P01</a> | carbonic anhydrase chloroplastic-like                   | chloroplast                       | 131  | 23  |
| <a href="#">GRMZM2G337113_P02</a> | glyceraldehyde-3-phosphate dehydrogenase A-2 (GAPA-2)   | plastid stroma                    | 124  | 10  |
| <a href="#">GRMZM2G046284_P01</a> | fructose-bisphosphate aldolase-2 (SFBA-2)               | plastid stroma                    | 119  | 8   |
| <a href="#">GRMZM2G089136_P01</a> | phosphoglycerate kinase                                 |                                   | 107  | 20  |
| <a href="#">GRMZM2G083716_P01</a> | Cpn60-beta-1                                            | plastid stroma                    | 101  | 11  |
| <a href="#">GRMZM2G079668_P01</a> | cpHSP70-1 (DnaK homologue)                              | plastid stroma                    | 66   | 3   |
| <a href="#">GRMZM2G047028_P01</a> | phosphoglycerate kinase                                 |                                   | 56   | 4   |
| <a href="#">GRMZM2G154218_P01</a> | elongation factor 1 alpha                               |                                   | 53   | 5   |
| <a href="#">GRMZM2G048907_P01</a> | CF1 gamma subunit (atpC)                                | thylakoid-peripheral-stromal-side | 49   | 2   |
| <a href="#">GRMZM2G134797_P02</a> | nucleoside diphosphate kinase                           |                                   | 48   | 8   |
| <a href="#">NP_043046</a>         | ribosomal protein S18                                   | chloroplast                       | 45   | 4   |
| <a href="#">GRMZM2G057535_P01</a> | elongation factor 1-alpha                               |                                   | 45   | 3   |
| <a href="#">GRMZM2G172369_P03</a> | lysosomal alpha-mannosidase-like                        |                                   | 43   | 1   |
| <a href="#">GRMZM2G008247_P01</a> | beta-D-glucosidase precursor                            |                                   | 40   | 8   |
| <a href="#">AC215201.3_FGP005</a> | Cpn60-alpha-1                                           | plastid stroma                    | 40   | 7   |
| <a href="#">GRMZM2G119169_P01</a> | 60S ribosomal protein L17                               |                                   | 40   | 3   |
| <a href="#">GRMZM2G129246_P01</a> | peroxisomal (S)-2-hydroxy-acid oxidase GLO1-like        |                                   | 39   | 2   |
| <a href="#">GRMZM2G134264_P01</a> | hypothetical protein                                    |                                   | 39   | 4   |
| <a href="#">GRMZM2G024354_P01</a> | 60S ribosomal protein L15                               |                                   | 32   | 1   |
| <a href="#">GRMZM2G013478_P01</a> | nucleoside diphosphate kinase 2                         |                                   | 31   | 6   |
| <a href="#">GRMZM2G360021_P01</a> | 50S ribosomal protein L12-1                             | plastid ribosome                  | 30   | 2   |
| <a href="#">GRMZM2G137868_P01</a> | serine-glyoxylate aminotransferase                      |                                   | 29   | 2   |
| <a href="#">GRMZM2G084465_P01</a> | 40S ribosomal protein S23                               |                                   | 29   | 2   |

**Supplemental Table 2.** Protein data obtained from gel slices corresponding to the position of LS<sub>C</sub>. Accession numbers are from Gramene. "Curated Loc." indicates the annotated subcellular location. "Score," the sum of the highest ion score for each protein; Match, the number of MS/MS spectra that were matched to each protein. The cells highlighted in yellow indicate proteins identified in both genotypes; cells highlighted in green indicate the chaperonins discussed in the main text.

2'

|    | Primer name  | Sequence                   |
|----|--------------|----------------------------|
| 1  | ZmBSD2-SQF   | CGTCTCCCGCCACTGCAAGA       |
| 2  | ZmBSD2-SQR   | TTCATCGAAAGTGCTAAACCGATGAC |
| 3  | ZmActin1-SQF | TACGAGCGCTGAGCGGGAGA       |
| 4  | ZmActin1-SQR | GCTGCTAGGAGCCAGGGACG       |
| 5  | ZmrbcL-Cod1  | TTGCCGCGACAACGGCCTAC       |
| 6  | ZmrbcL-Rev1  | TCGCGCCCTTCGTTACGAGC       |
| 7  | ZmRBCS2-Cod1 | GGCCTACGGCAACAAGAAGTT      |
| 8  | ZmRBCS2-Rev1 | CAAGAATCGACAGTCGTTGC       |
| 9  | ZmPsbA-5'    | CTTCTTCTTGCCCGAATCTG       |
| 10 | ZmPsbA-3'    | TATCGCATTCAATTGCTGCTC      |
| 11 | EoMu1        | GCCTCCATTTGTCGAAT CCC      |
| 12 | EoMu2        | GCCTCTATTTGTCGAATCCG       |
| 13 | ZmRAF1-FOR1  | AGCTCTACC AGCCGTTCCAC      |
| 14 | ZmRAF1-REV1  | CTCGAGCCTGTAGCCGATG        |
|    | ZmRAF1-FOR2  | GGTCCTGTACGAGCTCCGCT       |
| 15 | ZmRAF1-REV2  | CATGTCGTCCTCGTCCTTGG       |
| 16 | Zmqactin-1F  | GTG ACA ATGGCACTGGAATG     |
| 17 | Zmqactin-1R  | CCA TGCTCAATCGGGTACTT      |
| 18 | ZmqLS-1F     | AAGGGGAACGCGAAATAACT       |
| 19 | ZmqLS-123R   | AGGCTTCTAAAGCCACACGA       |
| 20 | ZmqSS-9F     | GTTTCGTGTACCGCGAGAACT      |
| 21 | ZmqSS-9R     | GTCGATCTAGCCACGGTCTC       |
| 22 | ZmqME-1F     | TGGCAGAGCAGACGTATTTG       |
| 23 | ZmqME-1R     | TGAAGGGAGCCTTTACGAGA       |
| 24 | ZmqMDH-1F    | TCACCTGCTGTTCAA ACTCG      |
| 25 | ZmqMDH-1R    | GGATACAGCGAGTCCTCCAG       |

**Supplemental Table 3.** Primers used in this work.
